# Supplementary material
Source: PubMed Central journal article supplement (PMC4744176)
Supplement: mmc1.pdf [file mmc1.pdf]

# Ca<sup>2+</sup> Effects on ATP Production and Consumption Have Key Regulatory Roles on Oscillatory Islet Activity

Joseph P. McKenna<sup>1</sup>, Joon Ha<sup>2</sup>, Matthew J. Merrins<sup>3,4</sup>, Leslie S. Satin<sup>5</sup>, Arthur Sherman<sup>2</sup>, and Richard Bertram<sup>1,6</sup>

<sup>1</sup>Department of Mathematics, Florida State University, Tallahassee, FL, USA; <sup>2</sup>Laboratory of Biological Modeling, NIDDK, National Institutes of Health, Bethesda, MD, USA; <sup>3</sup>Division of Endocrinology, Diabetes & Metabolism, Department of Medicine, and Department of Biomolecular Chemistry, University of Wisconsin-Madison School of Medicine and Public Health, Madison, WI, USA; <sup>4</sup>William S. Middleton Memorial Veterans Hospital, Madison, WI, USA; <sup>5</sup>Department of Pharmacology and Brehm Diabetes Center, University of Michigan, Ann Arbor, MI, USA; and <sup>6</sup>Programs in Neuroscience and Molecular Biophysics, Florida State University, Tallahassee, FL, USA

## SUPPORTING MATERIAL

### 1 Derivation of the Glycolytic Model

Glycolysis plus efflux of pyruvate through mitochondrial pyruvate dehydrogenase complex may be depicted, assuming the reaction catalyzed by triose phosphate isomerase is at equilibrium and that the concentrations of its product and substrate are equal, with the reaction scheme in Fig. 1 with labels given in Table 1.

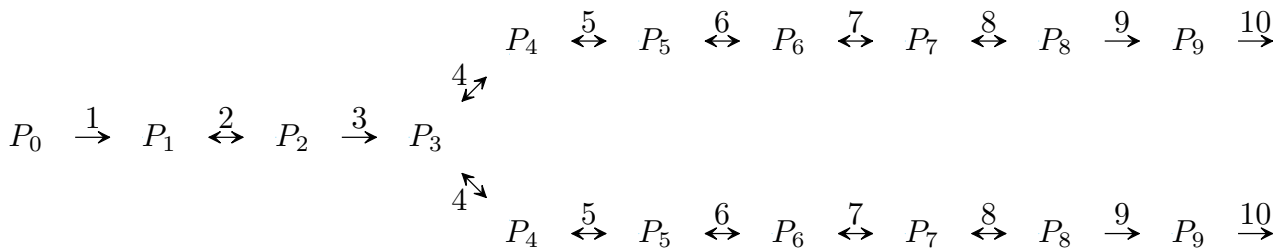

Figure 1: Reaction scheme for glycolysis plus efflux of pyruvate through mitochondrial pyruvate dehydrogenase complex.

Then, a system of differential equations for the reaction scheme, where  $P_i$  is the total concentration of product  $i$  and  $J_i$  is the total flux (concentration per time) through enzyme  $i$ , is

$$\begin{aligned} [P_i]' &= J_i - J_{i+1} \quad \text{for } 1 \leq i \leq 9, i \neq 3 \\ [P_3]' &= J_3 - \frac{1}{2}J_4. \end{aligned}$$

Assuming the reaction catalyzed by enzyme 2 (glucose 6-phosphate isomerase) is at equilibrium so that  $[P_1] = k_{12}[P_2]$  and  $[P_1]' = k_{12}[P_2]'$ ,

$$\begin{aligned} [P_1]' + [P_2]' &= J_1 - J_3 \\ [P_2]'(k_{12} + 1) &= J_1 - J_3 \\ [P_2]' &= \frac{1}{k_{\text{GPI}} + 1}(J_1 - J_3) \end{aligned}$$

| $i$ | Enzyme $i$                               | Product $P_i$                   |
|-----|------------------------------------------|---------------------------------|
| 0   | —                                        | glucose                         |
| 1   | glucokinase (GK)                         | glucose 6-phosphate             |
| 2   | glucose 6-phosphate isomerase (GPI)      | fructose 6-phosphate (F6P)      |
| 3   | phosphofructokinase (PFK)                | fructose 1,6-bisphosphate (FBP) |
| 4   | aldolase                                 | glyceraldehyde 3-phosphate      |
| 4*  | triose phosphate isomerase               | dihydroxyacetone phosphate      |
| 5   | glyceraldehyde 3-phosphate dehydrogenase | 1,3-bisphosphoglycerate         |
| 6   | phosphoglycerate kinase                  | 3-phosphoglycerate              |
| 7   | phosphoglycerate mutase                  | 2-phosphoglycerate              |
| 8   | enolase                                  | phosphoenolpyruvate             |
| 9   | pyruvate kinase                          | pyruvate (PYR)                  |
| 10  | pyruvate dehydrogenase (PDH)             | —                               |

Table 1: Enzymes and products of glycolysis plus pyruvate dehydrogenase. Each glycolytic enzyme has been labeled with its product except that enzyme 4 (aldolase) has two products:  $P_4$  (glyceraldehyde 3-phosphate) and  $P_{4^*}$  (dihydroxyacetone phosphate), and that  $P_4$  (glyceraldehyde 3-phosphate) is the product of two enzymes: enzyme 4 (aldolase) and enzyme 4\* (triose phosphate isomerase). Reaction 4\* is not shown in the reaction scheme of Fig. 8.

where  $k_{\text{GPI}} = k_{12}$ . Assuming the reactions catalyzed by enzymes 4 through 9 downstream to PFK are at equilibrium so that  $[P_i] = k_{ij}[P_j]$  and  $[P_i]' = k_{ij}[P_j]'$  for  $3 \leq i, j \leq 9$ ,

$$\begin{aligned}
 [P_3]' + \frac{1}{2}([P_4]' + \dots + [P_9]') &= J_3 - \frac{1}{2}J_{10} \\
 [P_3]' \left(1 + \frac{1}{2}(k_{43} + \dots + k_{93})\right) &= J_3 - \frac{1}{2}J_{10} \\
 [P_3]' &= \frac{1}{1 + \sum k_P} \left(J_3 - \frac{1}{2}J_{10}\right)
 \end{aligned}$$

where  $\sum k_P = \frac{1}{2}(k_{43} + \dots + k_{93})$ . That is,

$$\begin{aligned}
 [\text{F6P}]' &= \frac{1}{1 + k_{\text{GPI}}}(J_{\text{GK}} - J_{\text{PFK}}) \\
 [\text{FBP}]' &= \frac{1}{1 + \sum k_P}(J_{\text{PFK}} - \frac{1}{2}J_{\text{PDH}}).
 \end{aligned}$$

## 2 Model Equations and Parameters

Glycolysis:

$$\begin{aligned}
 d[\text{F6P}]/dt &= (1 + k_{\text{GPI}})^{-1} (J_{\text{GK}} - J_{\text{PFK}}) \\
 d[\text{FBP}]/dt &= (1 + k_{\text{LG}})^{-1} (J_{\text{PFK}} - J_{\text{PDH}}/2) \\
 J_{\text{PFK}} &= V_{\text{PFK}} ((1 - k_{\text{PFK}}) w_{1110} + k_{\text{PFK}} \sum_{i,j,l \in \{0,1\}} w_{ij1l}) / \sum_{i,j,k,l \in \{0,1\}} w_{ijkl} \\
 w_{ijkl} &= \frac{([\text{AMP}]/K_{\text{PFK}}^{\text{AMP}})^i ([\text{FBP}]/K_{\text{PFK}}^{\text{FBP}})^j ([\text{F6P}]^2/K_{\text{PFK}}^{\text{F6P}})^k ([\text{ATP}_c]^2/K_{\text{PFK}}^{\text{ATP}})^l}{J_{\text{AMP}}^{ik} J_{\text{FBP}}^{jk} J_{\text{MT}}^{il} J_{\text{BT}}^{jl} J_{\text{ATP}}^{kl}} \\
 J_{\text{PDH}} &= k_{\text{PDH}} [\text{PYR}]^{1/2} (1 + k_{\text{PDH}}^{Ca} / [Ca_m])^{-1}
 \end{aligned}$$

ATP Production/Hydrolysis:

$$\begin{aligned}
 d[\text{ATP}_c]/dt &= J_{\text{ANT}} - J_{\text{hyd}} \\
 J_{\text{ANT}} &= Vol_{m:\text{cyt}} V_{\text{ANT}} (1 + k_{\text{ANT}}^{Am} [\text{ADP}_m] / [\text{ATP}_m])^{-1} \exp(\psi_m F / (2RT)) \\
 J_{\text{hyd}} &= (k_{\text{hyd},\text{bas}} + k_{\text{hyd}}^{Ca} [Ca_c]) [\text{ATP}_c] \\
 [\text{ADP}_m] &= q_1 [Ca_c] + q_2 \exp(-J_{\text{PDH}}/q_3) \\
 A_{m,\text{tot}} &= [\text{ADP}_m] + [\text{ATP}_m]
 \end{aligned}$$

Ionic Currents:

$$\begin{aligned}
 dV/dt &= (I_{Ca(V)} + I_{K(V)} + I_{K(Ca)} + I_{K(ATP)}) / C_m \\
 dn_{K(V)}/dt &= (n_{K(V),\infty} - n_{K(V)}) / \tau_{K(V)} \\
 d[Ca_c]/dt &= k_{\text{cyt}}^{Ca} (J_{\text{PM}} - J_{\text{ER}}) \\
 d[Ca_{\text{ER}}]/dt &= k_{\text{ER}}^{Ca} Vol_{\text{cyt:ER}} J_{\text{ER}} \\
 I_{i(s)} &= g_{i(s)} n_{i(s)} \cdot (V - V_i), \quad i(s) \in \{Ca(V), K(V), K(Ca), K(ATP)\} \\
 n_{i(s),\infty} &= (1 + (k_{i(s)}/r(s))^{h_{i(s)}})^{-1}, \quad i(s) \in \{Ca(V), K(V), K(Ca)\} \\
 n_{i(s)} &= n_{i(s),\infty} \text{ for } i(s) \in \{Ca(V), K(V)\} \\
 r(s) &= \begin{cases} e^s & \text{if } s = V \\ [s] & \text{otherwise} \end{cases} \\
 n_{K(ATP)} &= 20 \frac{0.08(1 + 2[\text{MgADP}^-]/kdd) + 0.89([\text{MgADP}^-]/kdd)^2}{(1 + [\text{MgADP}^-]/kdd)^2 (1 + [\text{ADP}^{3-}]/ktd + [\text{ATP}^{4-}]/ktt)} \\
 [\text{MgADP}^-] &= 0.0164[\text{ADP}_c], \quad [\text{ADP}^{3-}] = 0.135[\text{ADP}_c], \quad [\text{ADP}^{4-}] = 0.05[\text{ATP}_c] \\
 J_{\text{PM}} &= -(I_{Ca(V)}/(2F) - k_{\text{PMCA}} [Ca_c]) \\
 J_{\text{ER}} &= k_{\text{ER},\text{in}} [Ca_c] - k_{\text{ER},\text{out}} ([Ca_{\text{ER}}] - [Ca_c]) \\
 [Ca_m] &= k_{Ca} [Ca_c]
 \end{aligned}$$

| Parameter         | Value                               | Parameter        | Value                                | Parameter         | Value                                |
|-------------------|-------------------------------------|------------------|--------------------------------------|-------------------|--------------------------------------|
| $J_{GK}$          | $9.45 \times 10^{-2} \mu\text{M/s}$ | $\sum k_P$       | 0.5                                  | $h_{Ca(V)}$       | 0.08                                 |
| $V_{PFK}$         | $0.9 \mu\text{M/s}$                 | $A_{c,tot}$      | 2.5 mM                               | $g_{K(V)}$        | 486 pS                               |
| $V_{PDH}$         | $0.37 \mu\text{M/s}$                | $A_{m,tot}$      | 15 mM                                | $v_{K(V)}$        | -16 mV                               |
| $k_{GPI}$         | 6.33                                | AMP              | 0.5 mM                               | $h_{K(V)}$        | 0.2                                  |
| $k_{PFK}$         | 0.06                                | $V_{ANT}$        | $72.45 \mu\text{M/s}$                | $\tau_{K(V)}$     | 111 ms                               |
| $k_{PFK}^{AMP}$   | $30 \mu\text{M}$                    | $k_{ANT}^A$      | 2                                    | $g_{K(Ca)}$       | 18 pS                                |
| $k_{PFK}^{F6P}$   | 50 mM                               | $k_{hyd}$        | $2.34 \times 10^{-2} \text{ s}^{-1}$ | $k_{K(Ca)}^{Ca}$  | $0.5 \mu\text{M}$                    |
| $k_{PFK}^{FBP}$   | $1 \mu\text{M}$                     | $k_{hyd,bas}$    | $8.1 \times 10^{-3} \text{ s}^{-1}$  | $h_{K(Ca)}^{Ca}$  | 2                                    |
| $k_{PFK}^{FBP-C}$ | $10 \mu\text{M}$                    | $q_1$            | 0                                    | $g_{K(ATP)}$      | 2960 pS                              |
| $k_{PFK}^{ATP}$   | $0.25 \mu\text{M}$                  | $q_2$            | 12.5 mM                              | $kdd$             | 17 mM                                |
| $k_{PFK}^{FBP}$   | $10 \mu\text{M}$                    | $q_3$            | $5 \mu\text{M/s}$                    | $ktd$             | 26 mM                                |
| $f_{AMP}$         | 0.02                                | $\psi_m$         | 164 mV                               | $ktt$             | 1 mM                                 |
| $f_{FBP}$         | 0.2                                 | $V_{ol_{m:c}}$   | 0.07                                 | $C_m$             | 5300 fF                              |
| $f_{MT}$          | 20                                  | $F/(RT)$         | 0.04 mV                              | $k_{PMCA}$        | $41 \text{ s}^{-1}$                  |
| $f_{BT}$          | 20                                  | $k_{Perceval}^A$ | 1 mM                                 | $k_{ER,in}$       | $83 \text{ s}^{-1}$                  |
| $f_{ATP}$         | 20                                  | $V_{Ca}$         | 25 mV                                | $k_{ER,out}$      | $4.14 \times 10^{-2} \text{ s}^{-1}$ |
| $k_{PDH}^{Ca_m}$  | $0.1 \mu\text{M}$                   | $V_K$            | -75 mV                               | $k_{cyt}^{Ca}$    | $9 \times 10^{-3}$                   |
| $k_{PFK}^{FBP}$   | $2 \mu\text{M}$                     | $g_{Ca(V)}$      | 180 pS                               | $f_{ER}^{Ca}$     | 0.01                                 |
| $k_{PK}^{Ca}$     | 5                                   | $v_{Ca(V)}$      | -20 mV                               | $V_{ol_{cyt:ER}}$ | 26.96                                |

Table 2: Parameter values for the model simulations in Fig. 2-7 unless otherwise specified.
